# Supplementary material for: POM-based metal organic frameworks with a woven fabric structure for lithium storage
Source: Royal Society of Chemistry journal article supplement (doi:10.1039/d1ce01538a), 2022-01-01
Supplement: d1ce01538a1.pdf [file d1ce01538a1.pdf]

## Supporting Information

### POM-based Metal Organic Frameworks with Woven Fabric Structure for Lithium Storage

Meng-Ting Li,<sup>a,b\*</sup> Jing-Wen Sun,<sup>c</sup> Yi-Fei-Liu,<sup>a</sup> Mei-Hui Niu,<sup>a</sup> Han-Yu Zou,<sup>a</sup> Da-Qiang Sun,<sup>\*b</sup> and Yang Yu<sup>\*a</sup>

*a* School of Chemistry and Chemical Engineering, Qufu Normal University, Qufu 273165, Shandong, China

*b* Shandong Sacred Sun Power Sources Co., Ltd. No.1, Shengyang Road, Qufu, Shandong 273100, China

*c* School of Pharmacy, Qiqihar Medical University, Qiqihar 161006, Heilongjiang, China

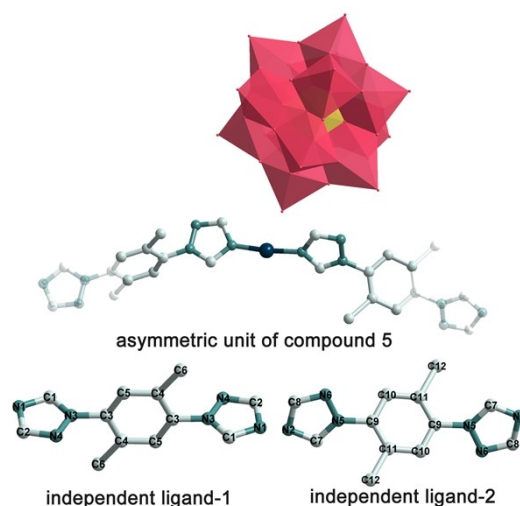

**Figure S1** Ball/stick/polyhedral view of the crystallographic unit and the ligands coordination pattern of Cu-BTDB-POM. All of the hydrogen atoms were omitted for clarity.

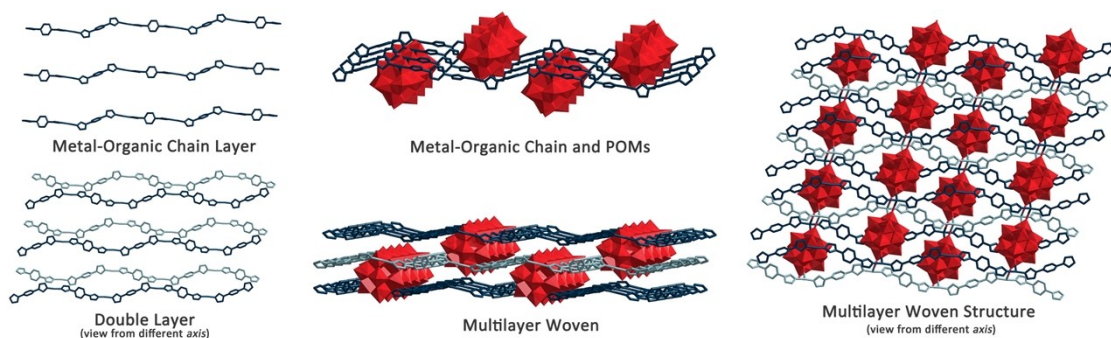

**Figure S2** Ball/stick/polyhedral view of the metal-organic chain layer and the woven structure of Cu-BTDB-POM. The woven structure is composed of metal-organic chain and POMs metal-inorganic chain. All of the hydrogen atoms were omitted for clarity.

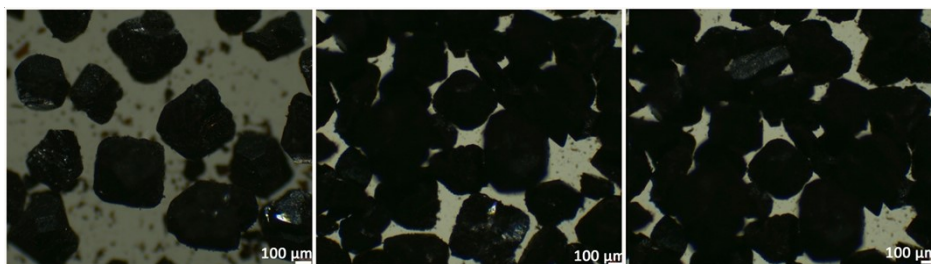

Figure S3 Light microscope photograph of the crystalline Cu-BTDB-POM. The maximum crystal size is about 600  $\mu\text{m}$ , and the average size is 350~400  $\mu\text{m}$ .

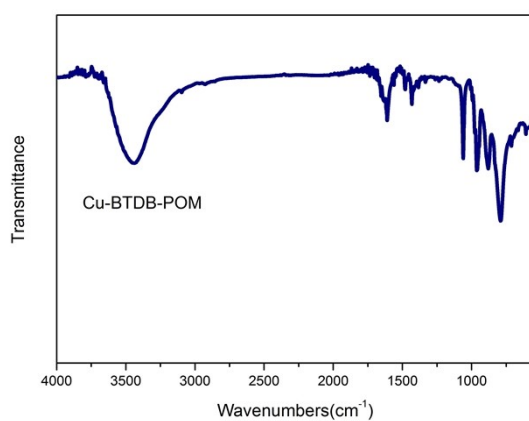

Figure S4 FT-IR spectrum of Cu-BTDB-POM.

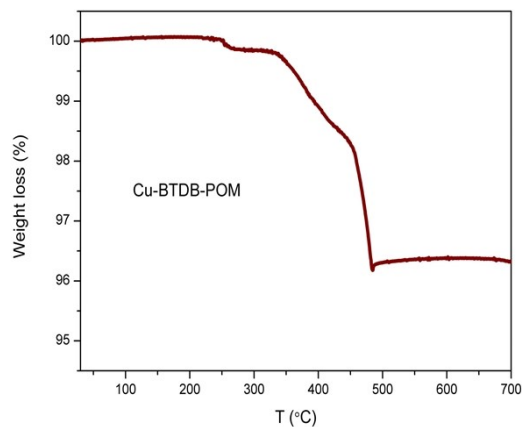

Figure S5 The TGA curve of Cu-BTDB-POM.

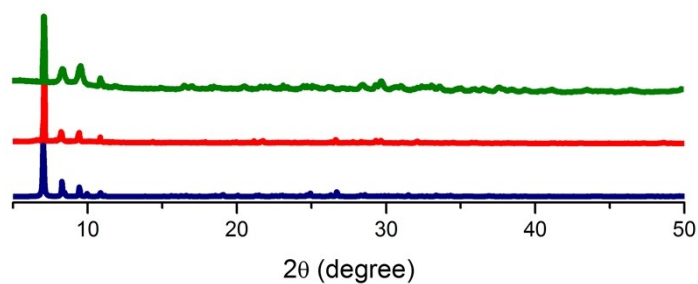

**Figure S6** The simulated (blue) and experimental (red) PXRD patterns of Cu-BTDB-POM and PXRD patterns of Cu-BTDB-POM@CNT (green).

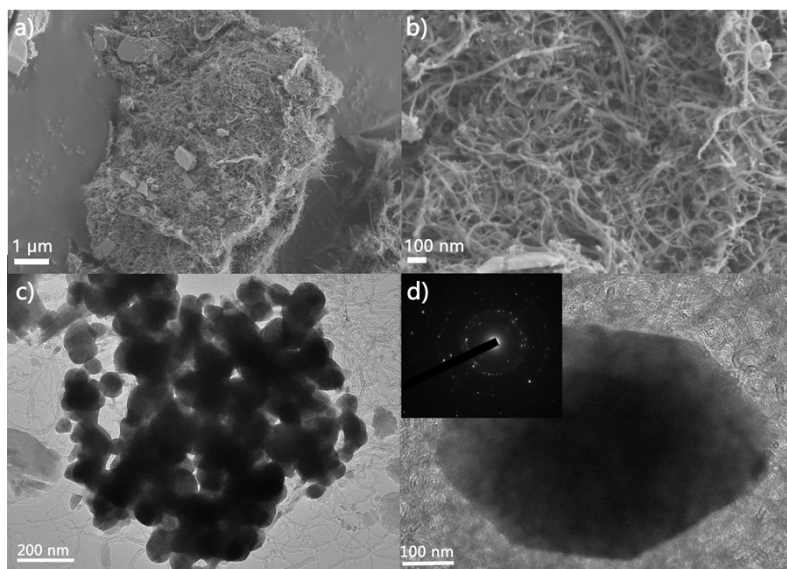

**Figure S7** a), b) SEM images and c), d) TEM images of Cu-BTDB-POM@CNT.

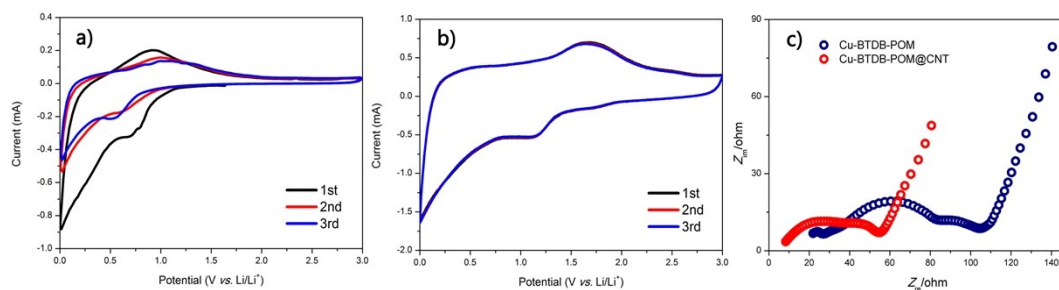

**Figure S8** Cyclic voltammograms of Cu-BTDB-POM and Cu-BTDB-POM@CNT anodes at the range of 0.01-3.0 V (scan rate: 0.1  $\text{mV s}^{-1}$ ). Nyquist plots of Cu-BTDB-POM and Cu-BTDB-POM@CNT anodes after the first discharge-charge process.

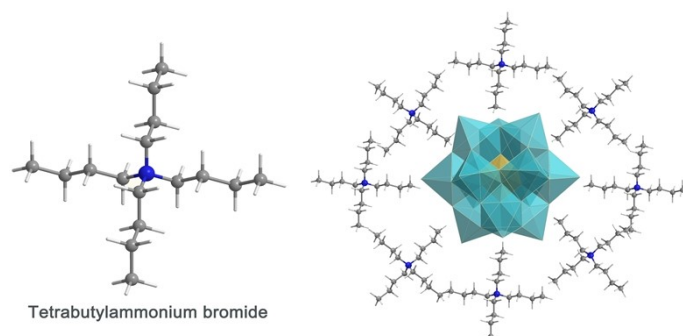

**Figure S9** Schematic diagram of  $(\text{NBu}_4)_3[\text{PMo}_{12}\text{O}_{40}]$ .

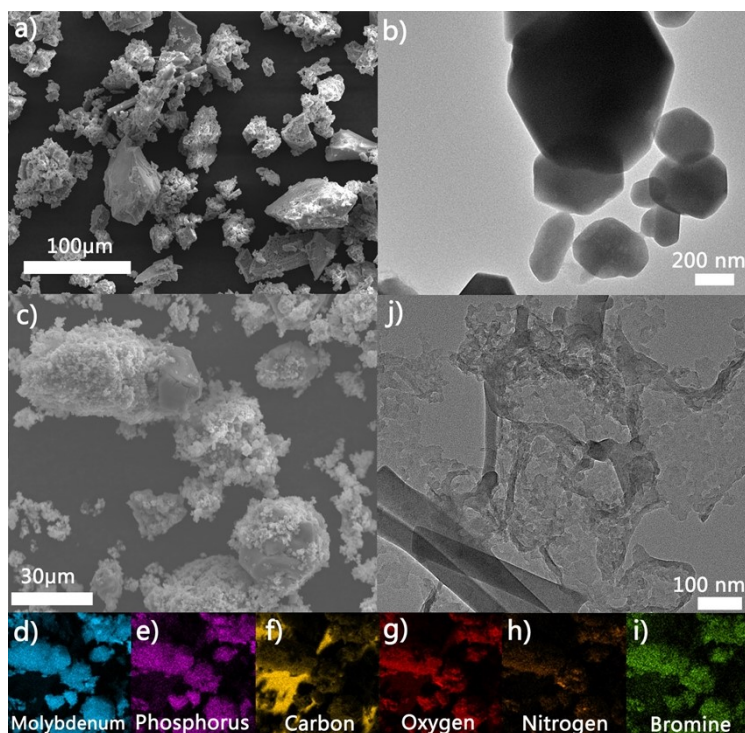

**Figure S10** SEM images of a)  $(\text{NBu}_4)_3[\text{PMo}_{12}\text{O}_{40}]$ , c)  $(\text{NBu}_4)_3[\text{PMo}_{12}\text{O}_{40}]\text{@PPy@CNT}$ , elemental mapping of d)-i)  $(\text{NBu}_4)_3[\text{PMo}_{12}\text{O}_{40}]\text{@PPy@CNT}$ , and TEM images of j)  $(\text{NBu}_4)_3[\text{PMo}_{12}\text{O}_{40}]\text{@PPy@CNT}$ .

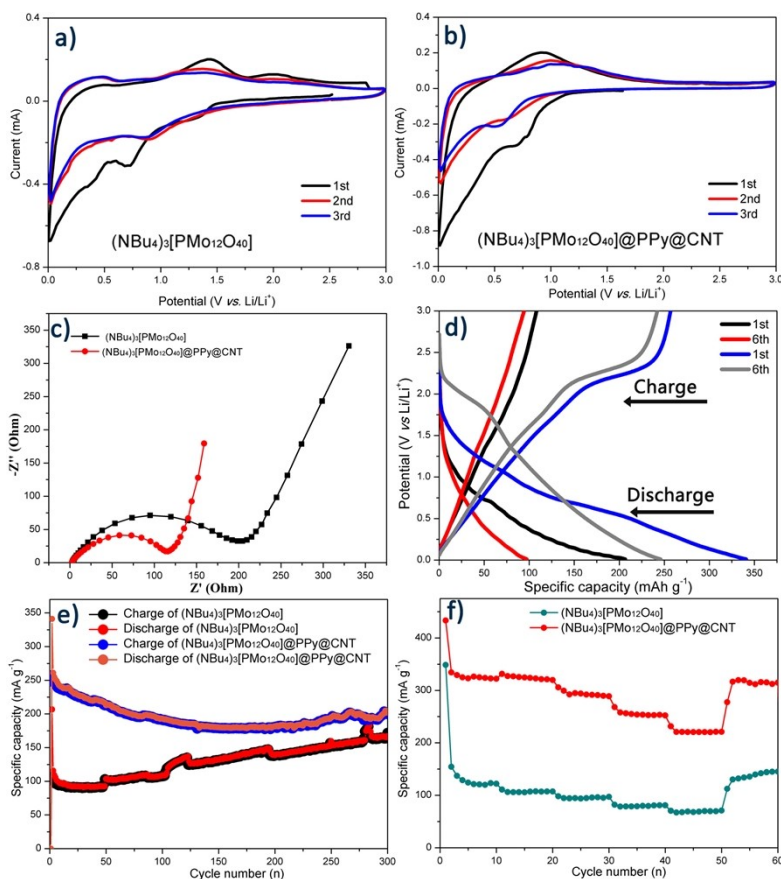

**Figure S11** a)-c) CV and EIS of  $(\text{NBu}_4)_3[\text{PMo}_{12}\text{O}_{40}]$  and  $(\text{NBu}_4)_3[\text{PMo}_{12}\text{O}_{40}]\text{@PPy@CNT}$ . d) The discharge/charge curves of  $(\text{NBu}_4)_3[\text{PMo}_{12}\text{O}_{40}]$  and  $(\text{NBu}_4)_3[\text{PMo}_{12}\text{O}_{40}]\text{@PPy@CNT}$ . e) The discharge

capacities and the coulombic efficiencies of (NBu<sub>4</sub>)<sub>3</sub>[PMo<sub>12</sub>O<sub>40</sub>] and (NBu<sub>4</sub>)<sub>3</sub>[PMo<sub>12</sub>O<sub>40</sub>]@PPy@CNT. f) Rate performances of (NBu<sub>4</sub>)<sub>3</sub>[PMo<sub>12</sub>O<sub>40</sub>] and (NBu<sub>4</sub>)<sub>3</sub>[PMo<sub>12</sub>O<sub>40</sub>]@PPy@CNT anodes at current densities of 100 mA g<sup>-1</sup> to 2000 mA g<sup>-1</sup>.

**Table 1** Crystal data and structure refinement for Cu-BTDB-POM.

| Compound reference                                                            | Cu-BTDB-POM                                                                                       |
|-------------------------------------------------------------------------------|---------------------------------------------------------------------------------------------------|
| Chemical formula                                                              | C <sub>24</sub> N <sub>12</sub> H <sub>13</sub> O <sub>41</sub> PMo <sub>12</sub> Cu <sub>2</sub> |
| Formula Mass                                                                  | 2434.76                                                                                           |
| Crystal system                                                                | Triclinic                                                                                         |
| <i>a</i> /Å                                                                   | 11.260(5)                                                                                         |
| <i>b</i> /Å                                                                   | 11.656(5)                                                                                         |
| <i>c</i> /Å                                                                   | 12.787(5)                                                                                         |
| <i>α</i> /°                                                                   | 79.302(5)                                                                                         |
| <i>β</i> /°                                                                   | 84.606(5)                                                                                         |
| <i>γ</i> /°                                                                   | 68.048(5)                                                                                         |
| Unit cell volume/Å <sup>3</sup>                                               | 1529.0(11)                                                                                        |
| Temperature/K                                                                 | 293                                                                                               |
| Space group                                                                   | <i>P</i> -1                                                                                       |
| No. of formula units per unit cell, <i>Z</i>                                  | 1                                                                                                 |
| No. of reflections measured                                                   | 5388                                                                                              |
| Final <i>R</i> <sub><i>I</i></sub> values ( <i>I</i> > 2σ( <i>I</i> ))        | 0.0808                                                                                            |
| Final <i>wR</i> ( <i>F</i> <sup>2</sup> ) values ( <i>I</i> > 2σ( <i>I</i> )) | 0.2390                                                                                            |
| Final <i>R</i> <sub><i>I</i></sub> values (all data)                          | 0.1461                                                                                            |
| Final <i>wR</i> ( <i>F</i> <sup>2</sup> ) values (all data)                   | 0.2941                                                                                            |
| Goodness of fit on <i>F</i> <sup>2</sup>                                      | 1.046                                                                                             |
| CCDC number                                                                   | 2121738                                                                                           |

**Table 2** Selected bonds lengths (Å) and angles (°) for Cu-BTDB-POM.

|             |           |             |           |
|-------------|-----------|-------------|-----------|
| Mo(2)-O(20) | 1.637(13) | Mo(3)-O(6)  | 1.918(15) |
| Mo(2)-O(19) | 1.873(14) | Mo(3)-O(17) | 1.926(15) |
| Mo(2)-O(5)  | 1.886(13) | Mo(3)-O(1)  | 2.33(2)   |
| Mo(2)-O(23) | 1.901(13) | Mo(3)-O(14) | 2.518(19) |
| Mo(2)-O(4)  | 1.928(15) | Mo(4)-O(16) | 1.644(15) |
| Mo(2)-O(11) | 2.39(2)   | Mo(4)-O(9)  | 1.862(13) |
| Mo(2)-O(14) | 2.44(2)   | Mo(4)-O(17) | 1.872(14) |

|                   |           |                    |           |
|-------------------|-----------|--------------------|-----------|
| Mo(3)-O(22)       | 1.638(11) | Mo(4)-O(10)        | 1.920(13) |
| Mo(3)-O(23)       | 1.862(13) | Mo(4)-O(19)        | 1.933(13) |
| Mo(3)-O(7)        | 1.879(18) | Mo(4)-O(2)         | 2.41(2)   |
| Mo(4)-O(14)       | 2.52(2)   | Mo(1)-O(3)         | 1.872(16) |
| Mo(6)-O(18)       | 1.661(12) | Mo(1)-O(8)         | 1.880(17) |
| Mo(6)-O(12)       | 1.846(16) | Mo(1)-O(5)         | 1.897(15) |
| Mo(6)-O(4)        | 1.853(16) | Mo(1)-O(1)#1       | 2.36(2)   |
| Mo(6)-O(9)#1      | 1.906(15) | Mo(1)-O(11)        | 2.47(2)   |
| Mo(6)-O(3)        | 1.915(16) | Mo(5)-O(13)        | 1.670(14) |
| Mo(6)-O(2)#1      | 2.412(18) | Mo(5)-O(10)#1      | 1.832(15) |
| Mo(6)-O(11)       | 2.41(2)   | Mo(5)-O(8)#1       | 1.896(17) |
| Mo(1)-O(21)       | 1.640(13) | Mo(5)-O(12)        | 1.898(16) |
| Mo(1)-O(6)#1      | 1.824(16) | Mo(5)-O(7)         | 1.920(18) |
| Mo(5)-O(2)#1      | 2.49(2)   | O(1)-Mo(1)#1       | 2.36(2)   |
| Cu(1)-O(18)       | 2.657(2)  | O(2)-O(11)#1       | 1.79(3)   |
| Cu(1)-N(1)        | 1.857(14) | O(2)-Mo(6)#1       | 2.412(18) |
| Cu(1)-N(2)        | 1.866(13) | O(2)-Mo(5)#1       | 2.49(2)   |
| O(9)-Mo(6)#1      | 1.906(15) | O(8)-Mo(5)#1       | 1.896(17) |
| O(10)-Mo(5)#1     | 1.832(15) | O(6)-Mo(1)#1       | 1.824(16) |
| C(4)#3-C(5)-C(3)  | 117(2)    | C(9)-C(10)-C(11)#2 | 118.3(18) |
| C(5)#3-C(4)-C(3)  | 118(2)    | O(8)-Mo(1)-O(1)#1  | 65.8(8)   |
| C(5)#3-C(4)-C(6)  | 120(2)    | N(1)-Cu(1)-N(2)    | 174.0(7)  |
| O(17)-Mo(4)-O(10) | 154.4(8)  | O(18)-Mo(6)-O(9)#1 | 100.2(8)  |
| O(16)-Mo(4)-O(19) | 100.4(8)  | O(12)-Mo(6)-O(9)#1 | 87.3(7)   |
| O(9)-Mo(4)-O(19)  | 156.5(8)  | O(4)-Mo(6)-O(9)#1  | 158.3(7)  |
| O(17)-Mo(4)-O(19) | 87.5(6)   | O(18)-Mo(6)-O(3)   | 99.3(9)   |
| O(20)-Mo(2)-O(19) | 102.5(8)  | O(23)-Mo(3)-O(17)  | 87.3(6)   |
| O(20)-Mo(2)-O(5)  | 100.3(8)  | O(7)-Mo(3)-O(17)   | 157.0(8)  |
| O(19)-Mo(2)-O(5)  | 90.8(6)   | O(6)-Mo(3)-O(17)   | 87.8(7)   |
| O(20)-Mo(2)-O(23) | 103.4(8)  | O(22)-Mo(3)-O(1)   | 159.0(8)  |

---

Symmetry transformations used to generate equivalent atoms: #1=-x+2,-y,-z+1; #2 -x+1,-y+1,-z+2; #3=-x+1,-y+2,-z.
